# Supplementary material
Source: MDPI journal article supplement (https://www.mdpi.com/2813-4168/1/2/11)
Supplement: s1 [file s1 › air-2393732-supplementary.pdf]

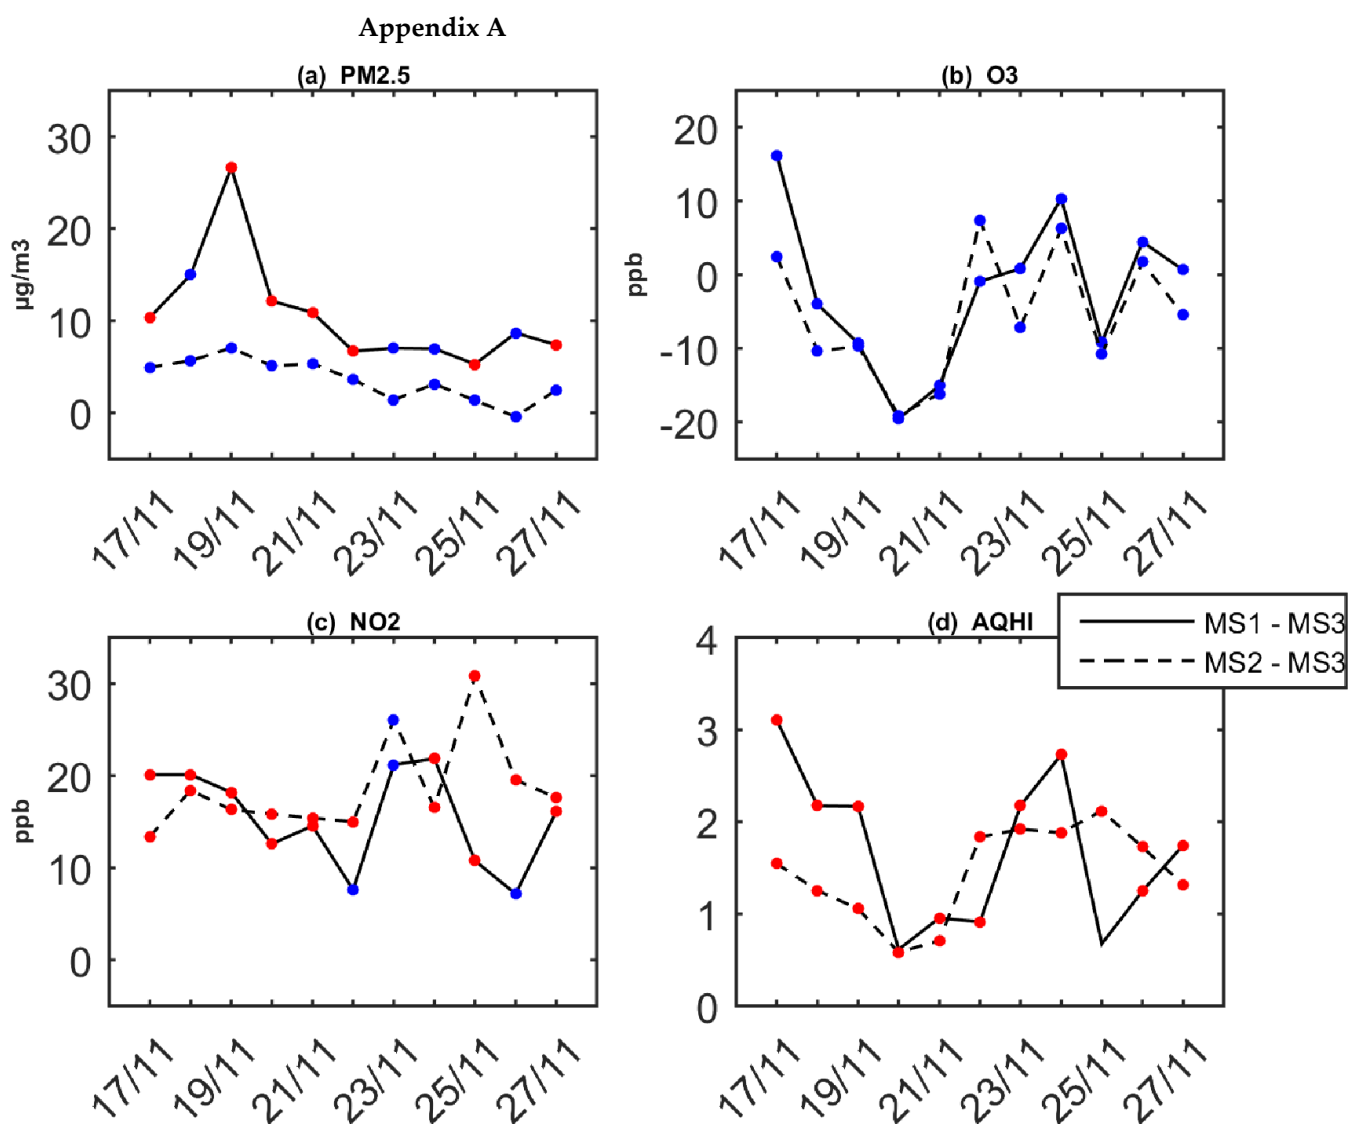

**Figure S1.** Daily anomalies of (a) PM<sub>2.5</sub>, (b) O<sub>3</sub>, (c) NO<sub>2</sub> concentrations and (d) AQHI for and AQHI between MS1 (city center station) and MS3 (urban station) as well as MS2 (port station) and MS3 (urban station), respectively. Red/ blue points show the statistically significant/ insignificant differences at 95%.

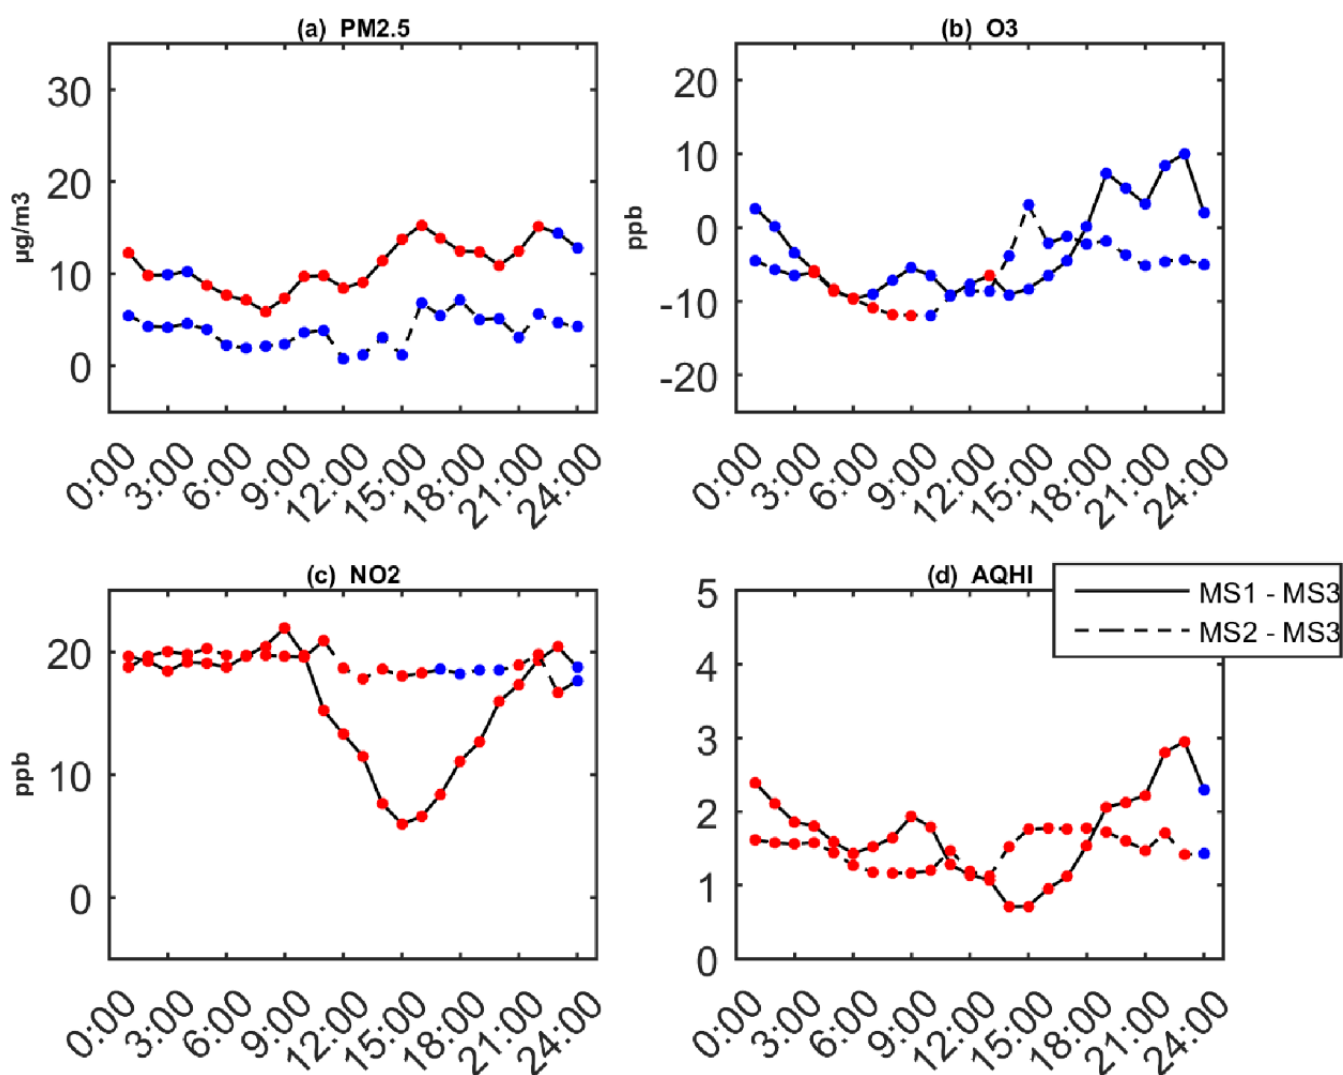

**Figure S2:** Diurnal anomalies of (a) PM<sub>2.5</sub>, (b) O<sub>3</sub>, (c) NO<sub>2</sub> concentrations and (d) AQHI between MS1 (city center station) and MS3 (urban station) as well as MS1 (city center station) and MS2 (port station), respectively. Red/ blue point show the statistically significant/ insignificant differences at 95%.

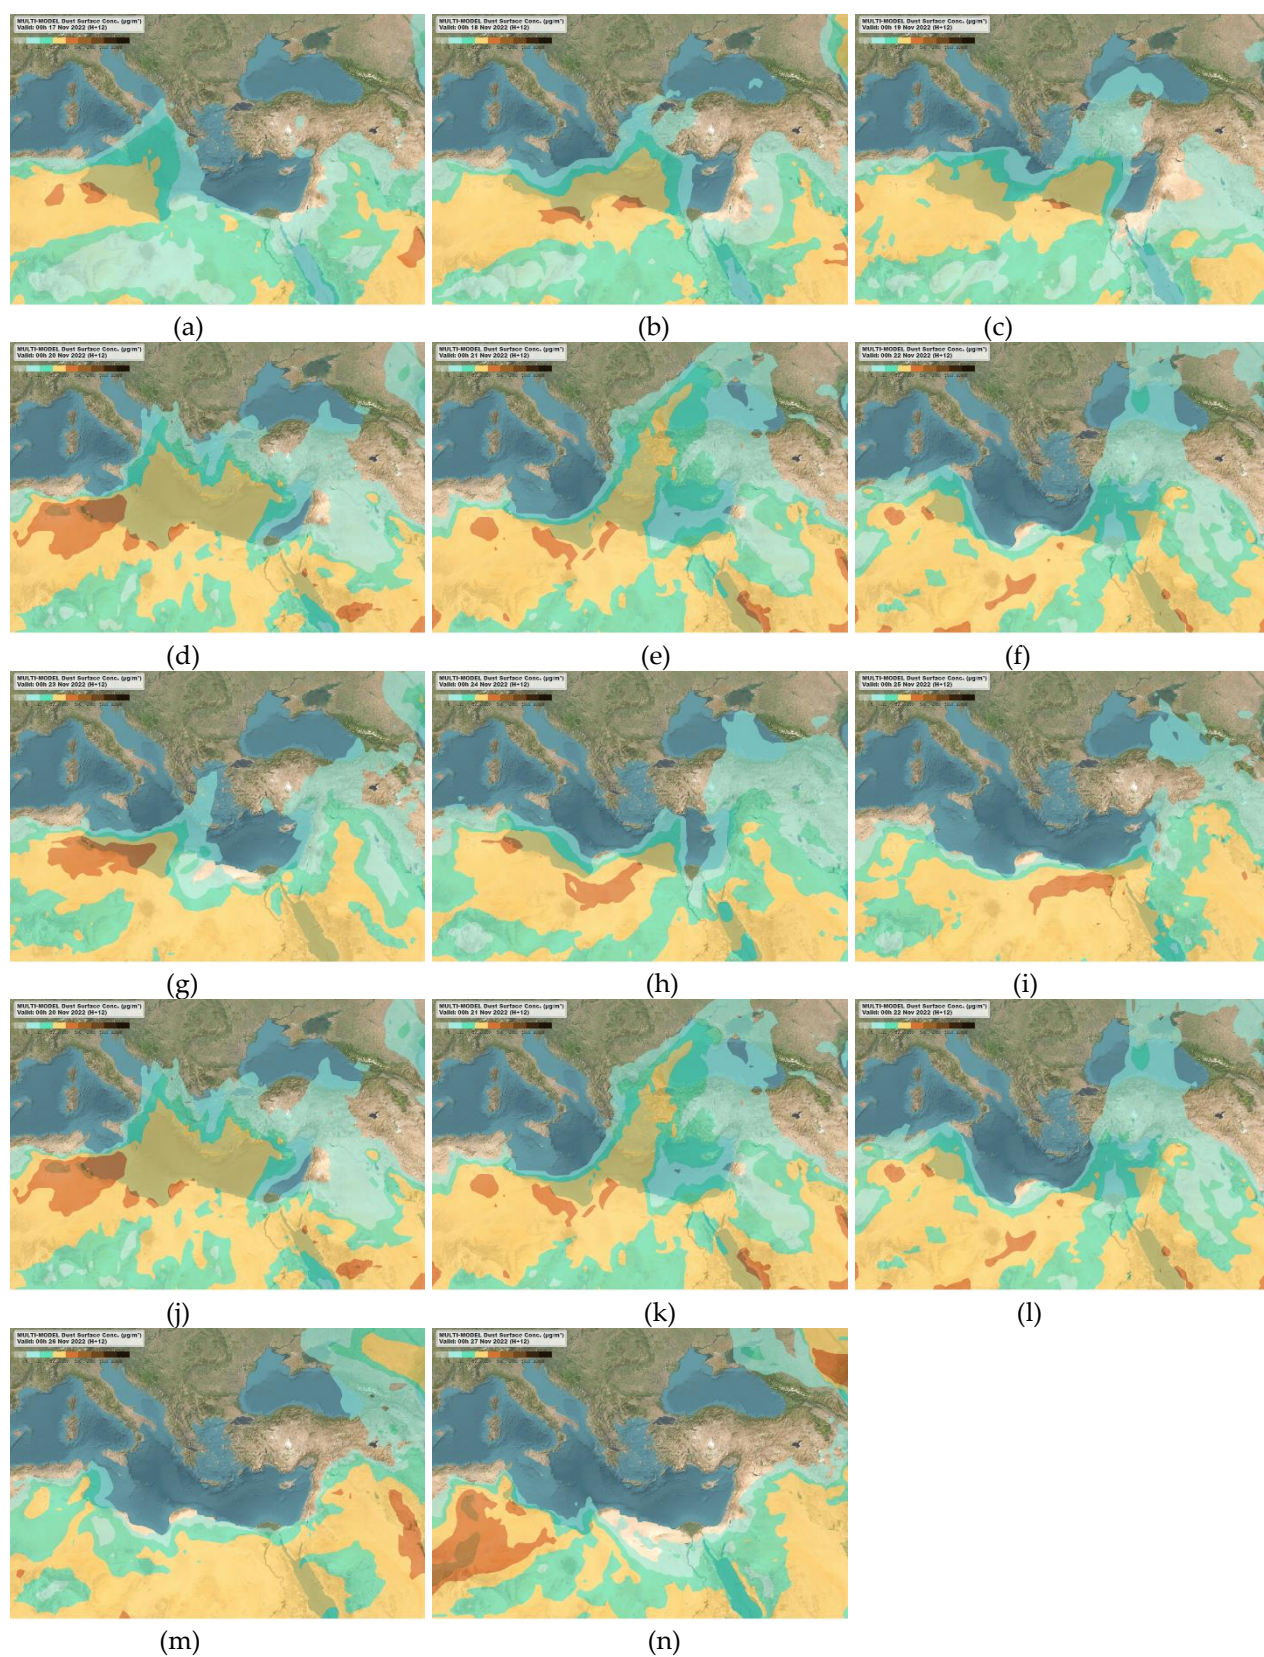

**Figure S3.** Images at 00:00 of the multi-model mean dust surface concentration ( $\mu\text{g}/\text{m}^3$ ) during the period from (a) – (n): 17<sup>th</sup> to 27<sup>th</sup> November 2022. Images were provided by the WMO Barcelona Dust Regional Center. (Source: <https://dust.aemet.es/products/daily-dust-products>, assessed date: 8 March 2022).
